# Supplementary figures and images for: Modulation of ATP Production Influences Inorganic Polyphosphate Levels in Non-Athletes’ Platelets at the Resting State
Source: MDPI journal article supplement (doi:10.3390/ijms231911293), 2022-09-25

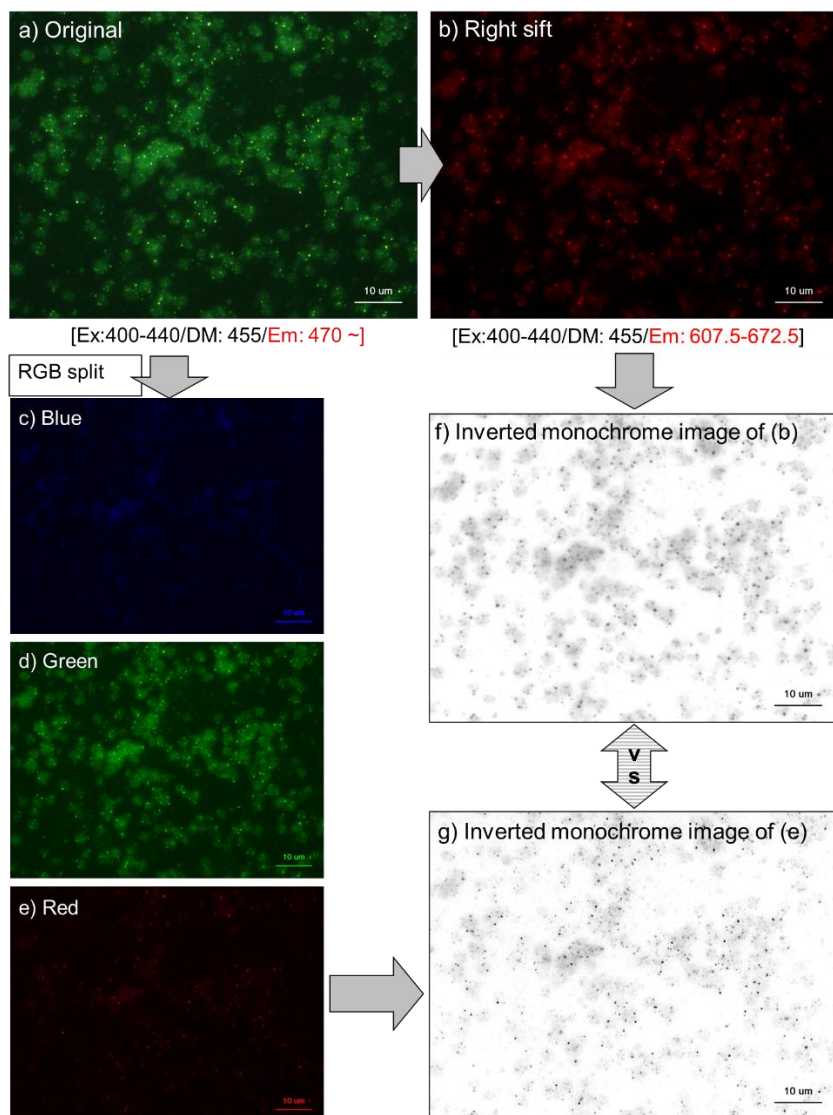

**Figure S1.** Optimization of image analysis of DAPI-reactive microparticles in platelets.

Supplement: s1 [file s1]
